# Supplementary material for: Seasonal Changes in Soil Microbial Community and Co-Occurrence Network of Species of the Genus Corylus
Source: Microorganisms. 2021 Oct 26;9(11):2228. doi: 10.3390/microorganisms9112228 (PMC8625130; doi:10.3390/microorganisms9112228)
Supplement: Supplementary file 1 [file microorganisms-09-02228-s001.zip]

Archive with 14 entries (14 files):
- Figure S1.jpg
- Figure S2.jpg
- Figure S3.jpg
- Figure S4.jpg
- Figure S5.jpg
- Figure S6.jpg
- Figure S7.jpg
- Figure S8.png
- Figure S9.jpg
- microorganisms-1380492-supplementary - proofreading-done.pdf
- Table S1.xlsx
- Table S2.xlsx
- Table S3.xlsx
- Table S4.xlsx
