# Supplementary material for: Seasonal Changes in Soil Microbial Community and Co-Occurrence Network of Species of the Genus Corylus
Source: Microorganisms. 2021 Oct 26;9(11):2228. doi: 10.3390/microorganisms9112228 (PMC8625130; doi:10.3390/microorganisms9112228)
Supplement: Supplementary file 1 [file microorganisms-09-02228-s001.zip › microorganisms-1380492-supplementary - proofreading-done.pdf]

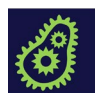

Supplementary Material

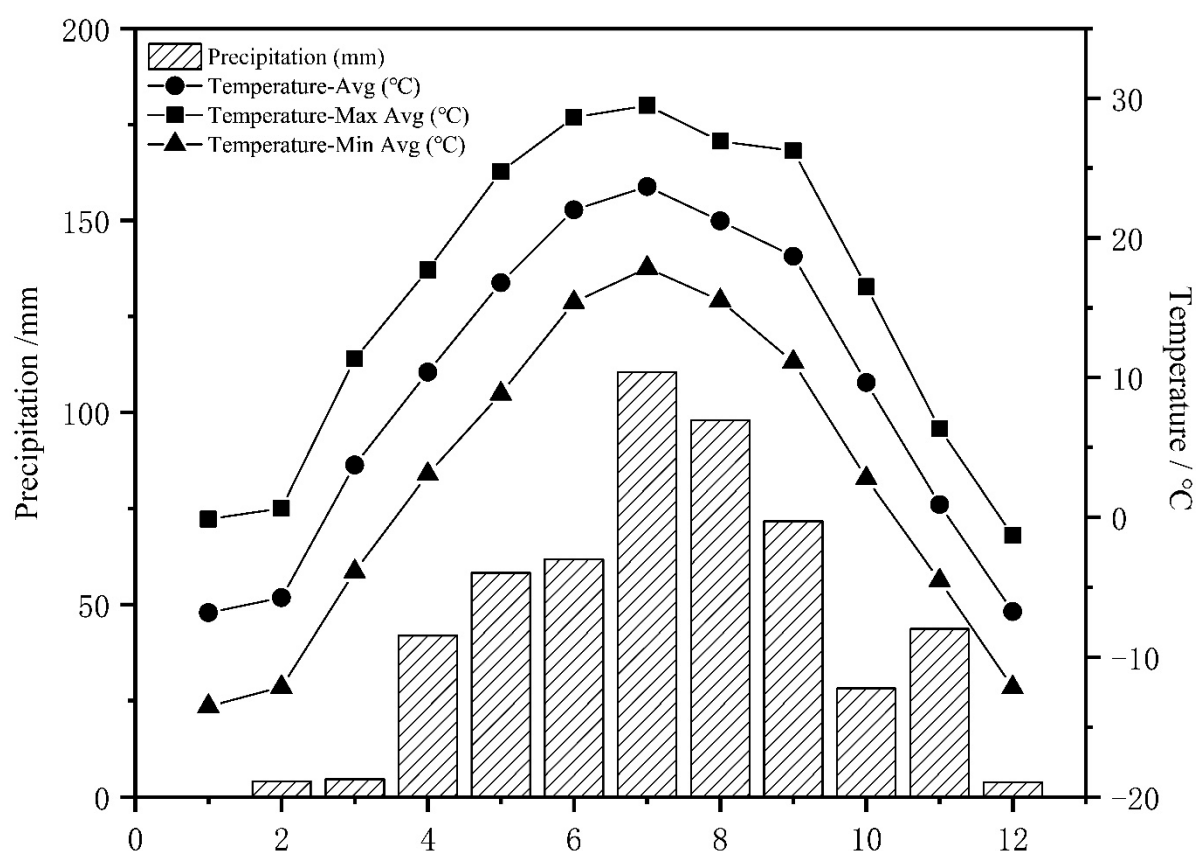

Figure S1. Precipitation and temperature of Yanqing in 2019.

Fungi

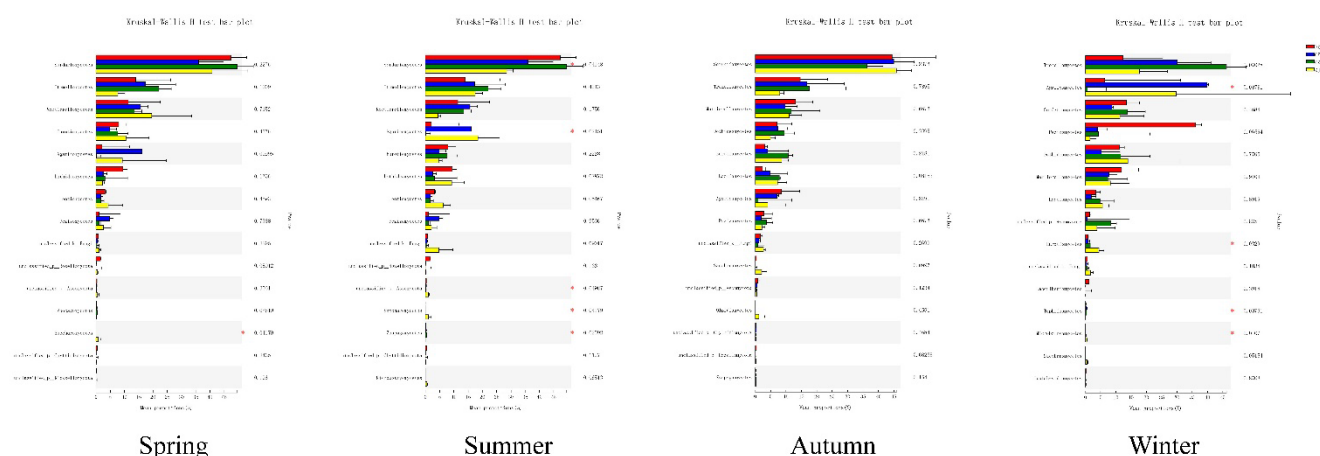

Figure S2. Significant difference between fungal groups.

## Bacteria

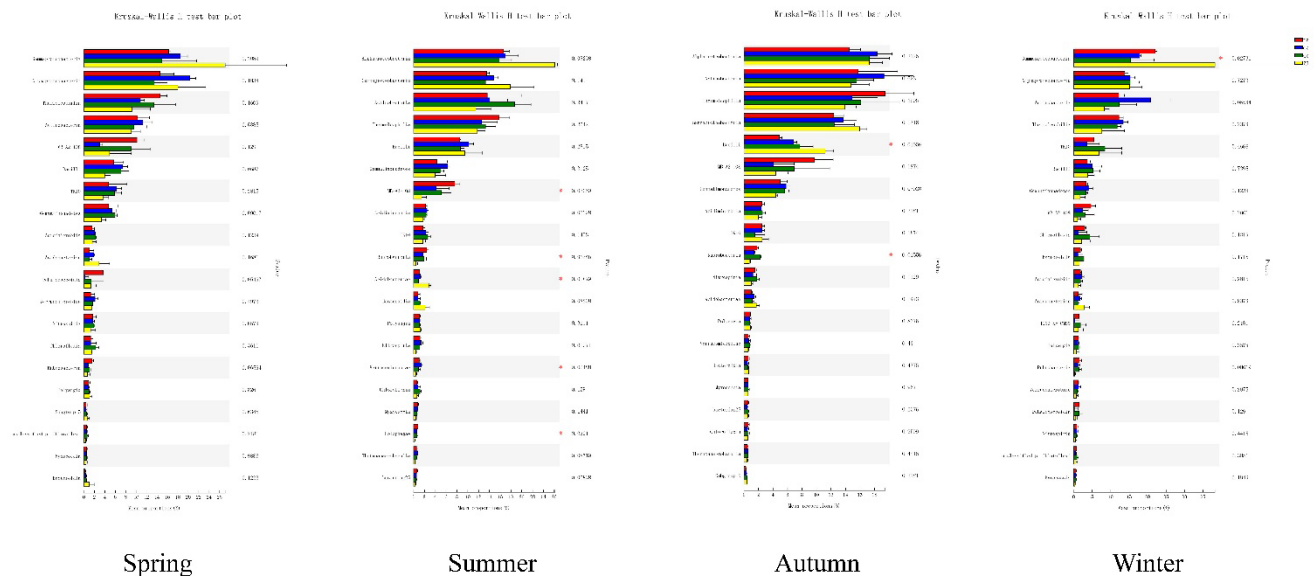

Figure S3. Significant difference between bacterial groups.

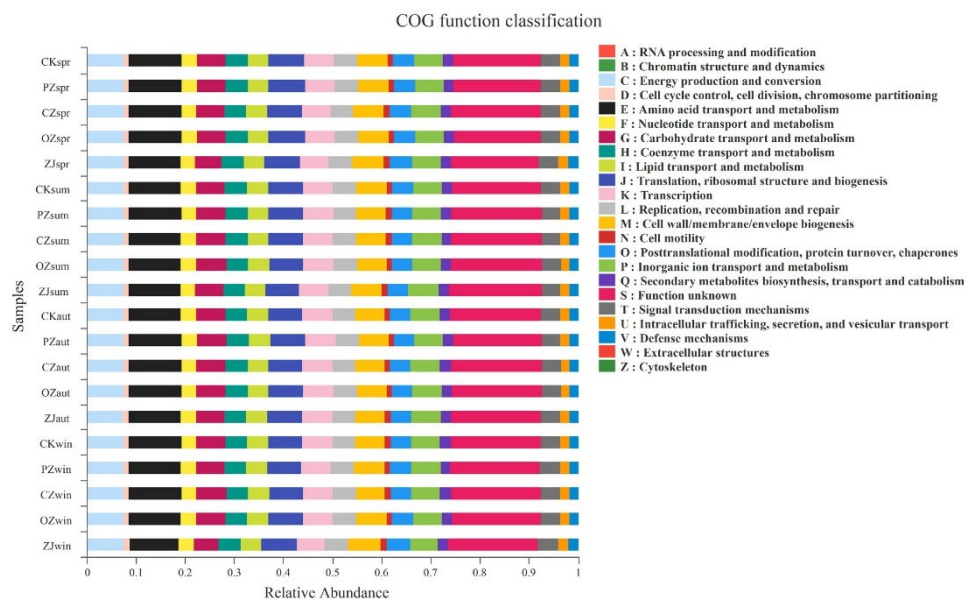

**Figure S4.** The bacterial community functional features in four *Corylus* species in different seasons. CK: control; PZ: *C. heterophylla*; CZ: *C. kweichowensis*; OZ: *C. avellane*; ZJ: *C. heterophylla* × *C. avellane*; spr: spring; sum: summer; aut: autumn; win: winter.

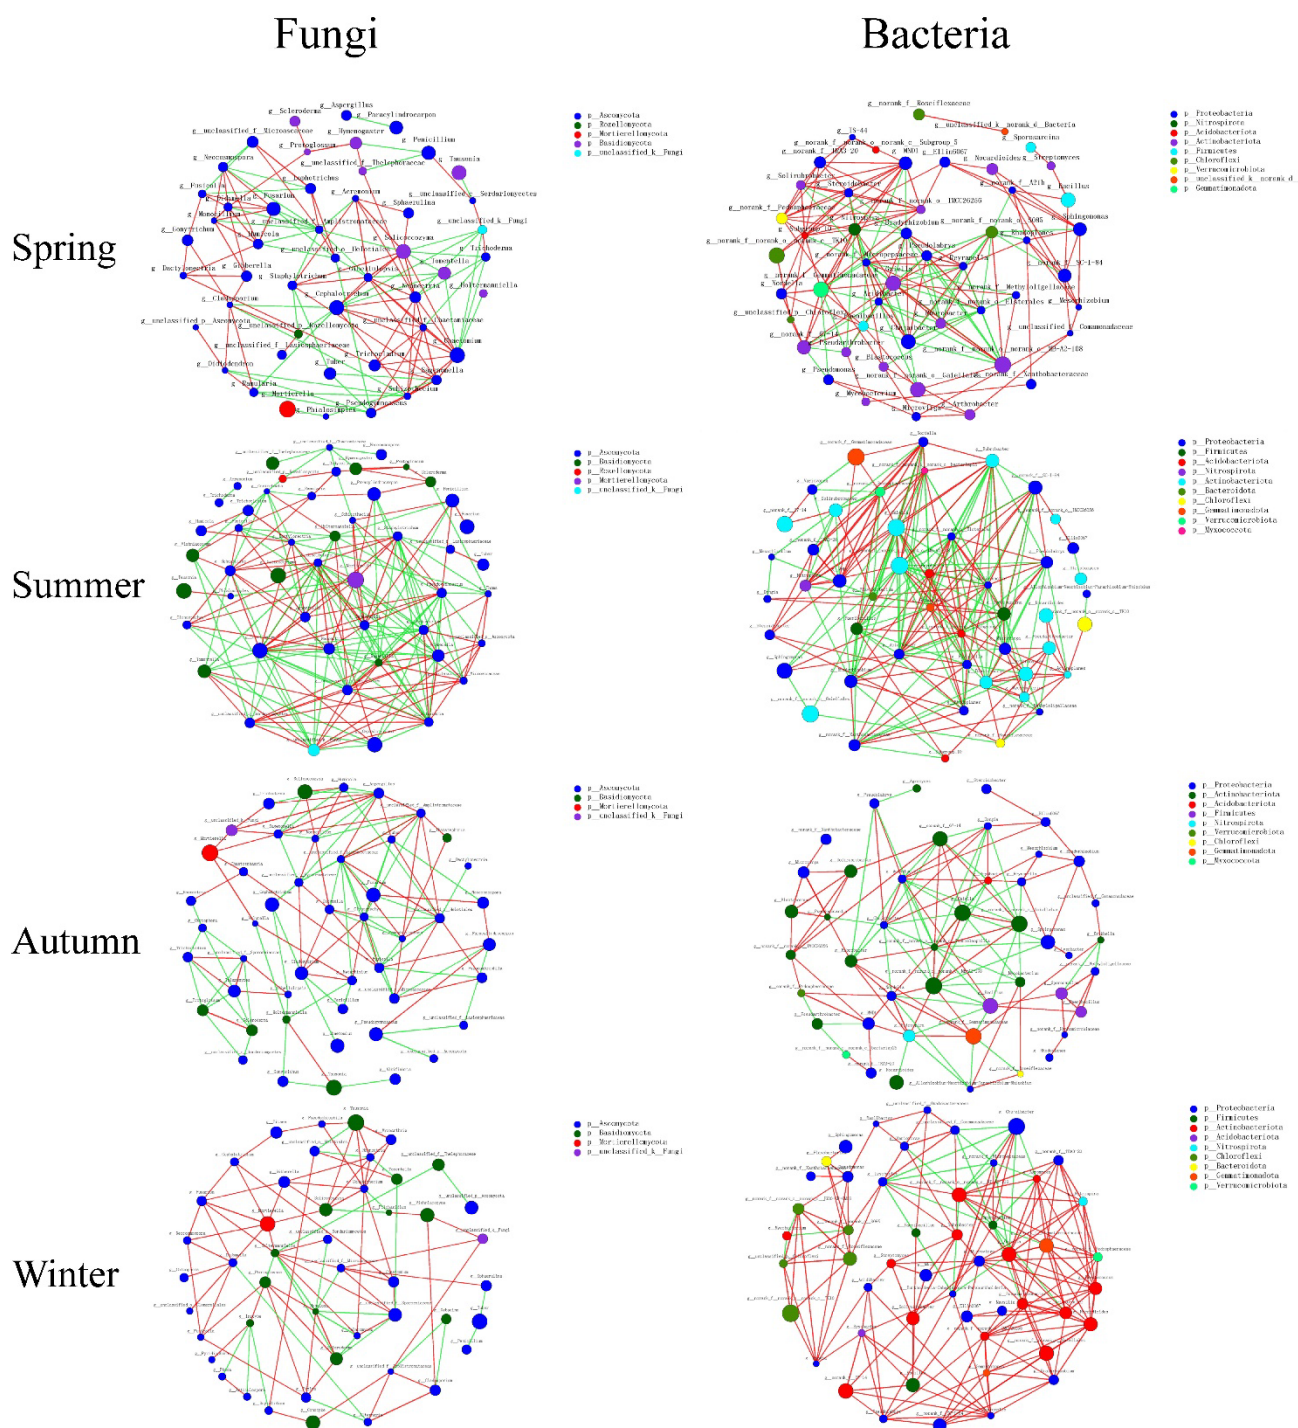

**Figure S5.** Co-occurring network of fungal and bacterial communities in different seasons. CK: control; PZ: C. heterophylla; CZ: C. kweichowensis; OZ: C. avellane; ZJ: C. heterophylla × C. avellane.

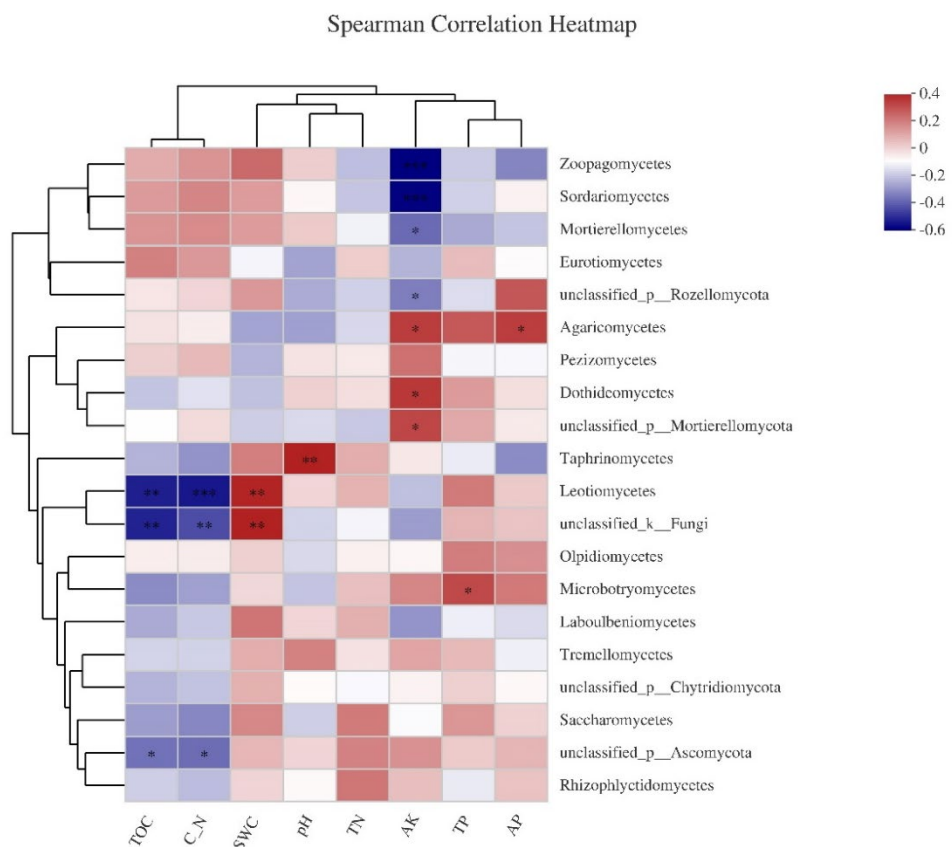

Figure S6. Heatmap of correlation analysis of fungal environmental factors.

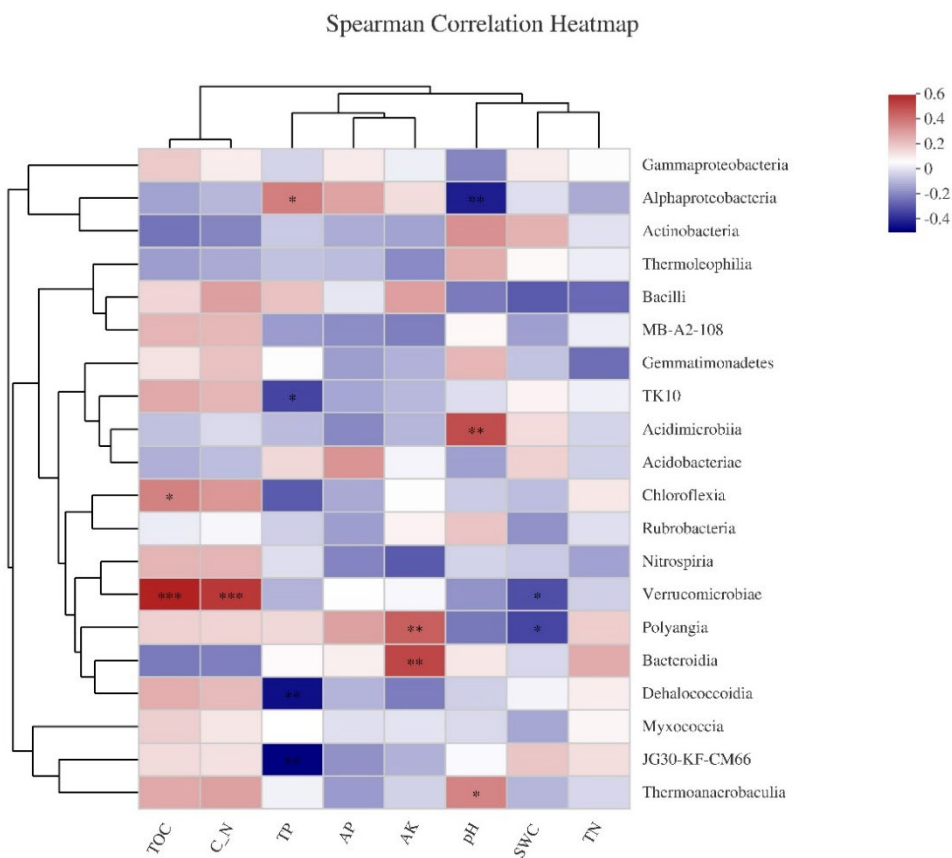

Figure S7. Heatmap of correlation analysis of bacterial environmental factors.

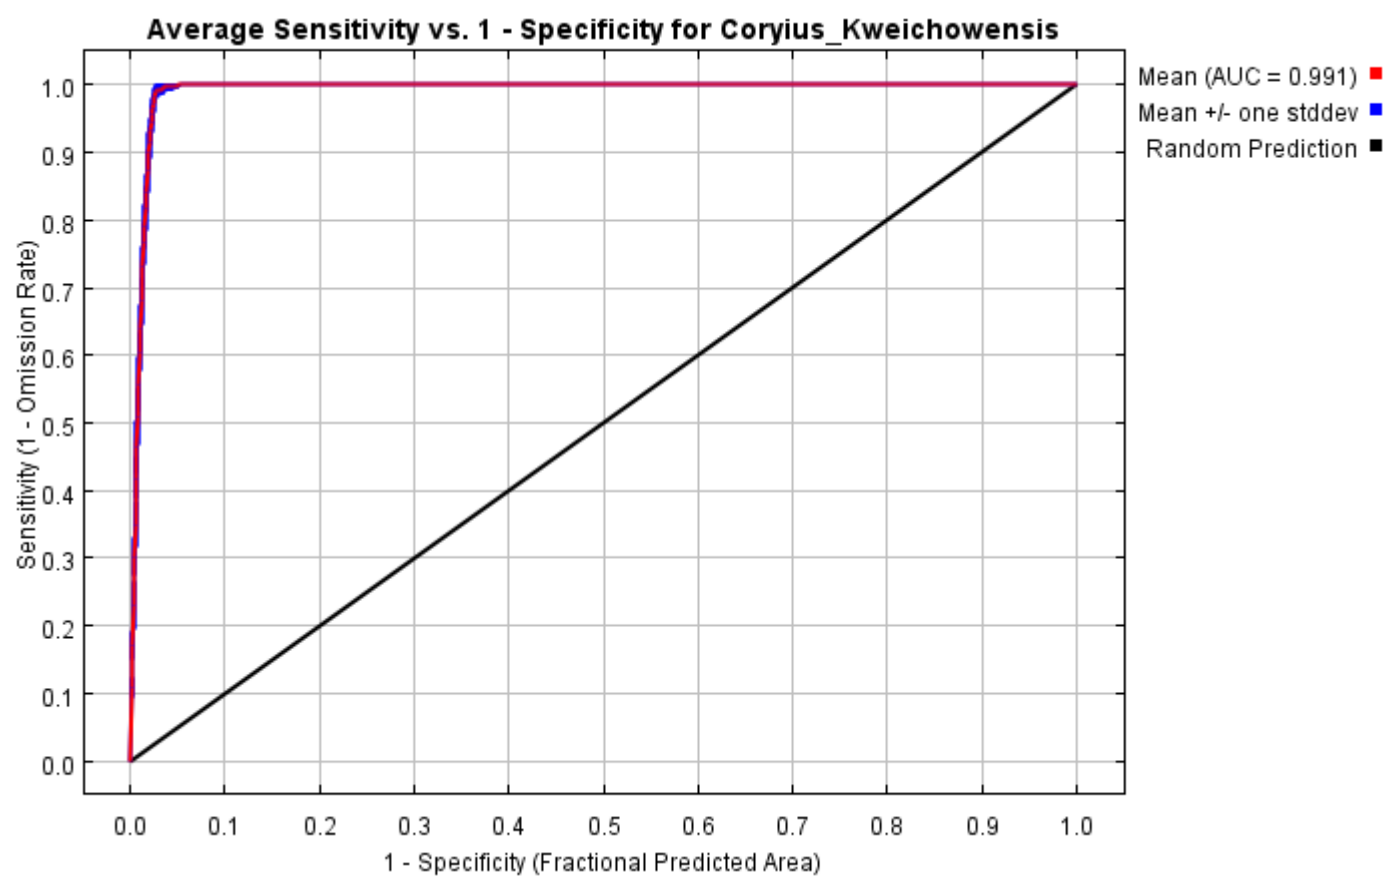

**Figure S8.** Receiver operator characteristic (ROC) curves of Maxent model.

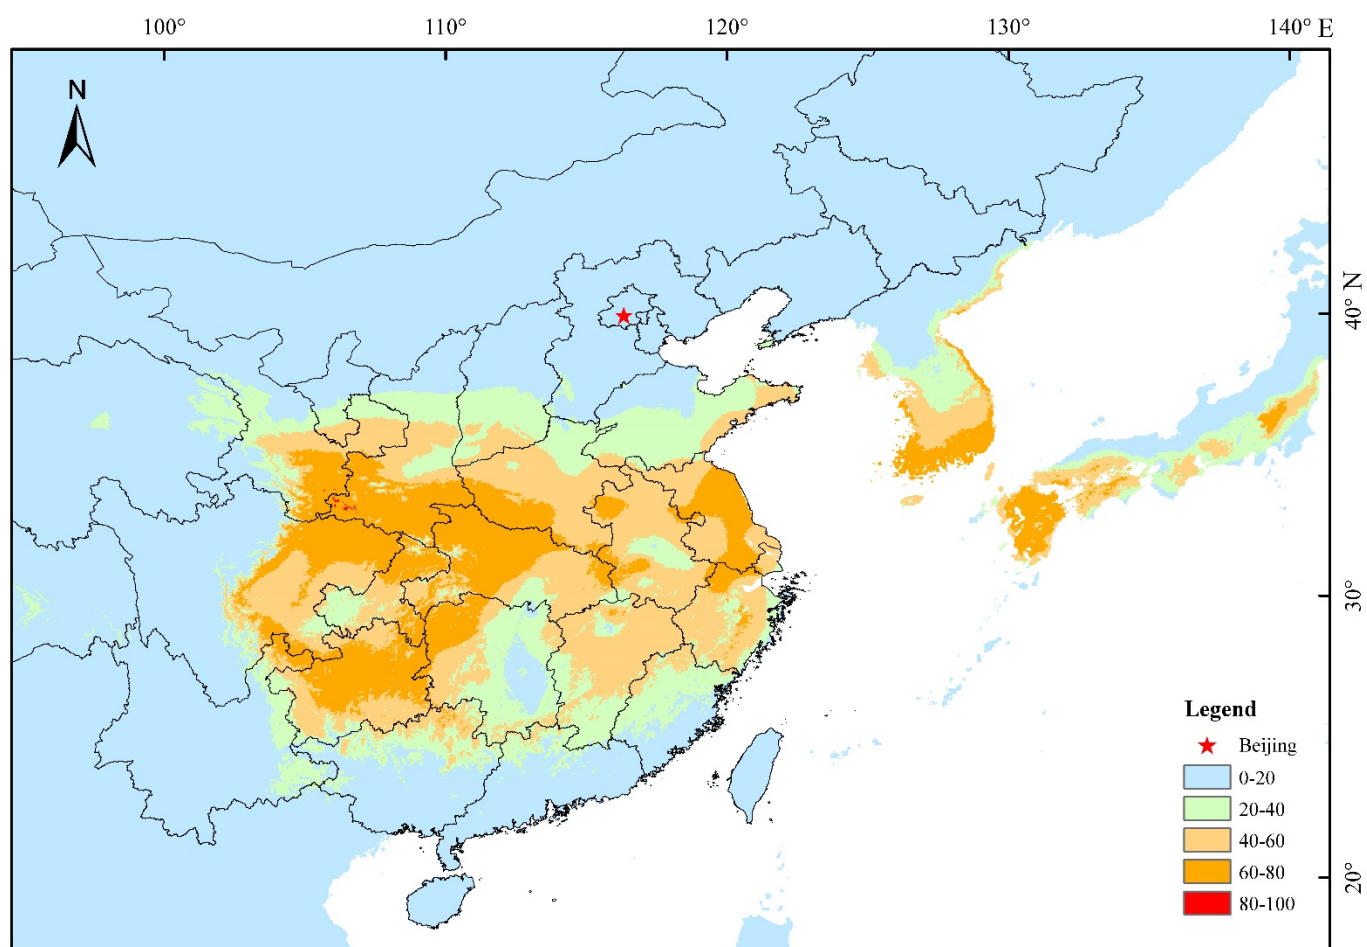

**Figure S9.** Modelled climatically suitable areas for the *C. kweichowensis* at 2041–2060.
