# Supplementary material for: Seasonal Changes in Soil Microbial Community and Co-Occurrence Network of Species of the Genus Corylus
Source: Microorganisms. 2021 Oct 26;9(11):2228. doi: 10.3390/microorganisms9112228 (PMC8625130; doi:10.3390/microorganisms9112228)
Supplement: Supplementary file 1 [file microorganisms-09-02228-s001.zip › Table S1.xlsx]

## Sheet: Sheet 1
Table S1 Soil Properties of four Corylus species
Sample	pH	Average	SWC(%)	Average	TOC(g/kg）	Average	TN(g/kg）	Average	C/N	Average	TP(g/kg）	Average	AP(mg/kg）	Average	AK(mg/kg）	Average
CK1spr	5.6	5.3	17.7428	16.7966	9.42099	9.48338	2.03727	2.0489	4.62433	4.62807	2.12655	2.13513	90.0661	91.0062	87.9007	88.7594
CK2spr	5.1		16.2132		9.23383		2.00674		4.60141		2.12226		95.304		86.3156
CK3spr	5.2		16.4338		9.79531		2.10269		4.65847		2.15659		87.6486		92.0618
CK1sum	6.9	6.73333	10.4453	10.9921	13.7568	13.5281	2.11577	2.06925	6.50205	6.53839	1.79611	1.80183	94.0952	94.6996	85.7211	84.4002
CK2sum	6.6		11.3523		13.4761		2.03291		6.62898		1.77036		96.7141		83.9379
CK3sum	6.7		11.1787		13.3513		2.05907		6.48414		1.83902		93.2894		83.5416
CK1aut	6.4	6.7	29.3	29	10.8247	11.0222	1.7407	1.73489	6.21856	6.35381	1.58153	1.62302	70.122	71.3307	72.4455	72.8418
CK2aut	6.9		28.73		11.043		1.71018		6.45725		1.62445		74.9569		74.0307
CK3aut	6.8		28.97		11.199		1.75379		6.38561		1.66307		68.9132		72.0492
CK1win	7.1	7.13333	23.5	23.3767	11.9476	12.1764	1.7407	1.7596	6.86368	6.93146	1.77894	1.77036	77.5758	75.897	91.071	89.684
CK2win	7.1		22.93		12.4155		1.68837		7.35356		1.73603		74.9569		89.8822
CK3win	7.2		23.7		12.166		1.84973		6.57715		1.79611		75.1584		88.0989
PZ1spr	5.6	5.3	17.5818	16.6547	16.7329	15.3782	1.55753	1.55753	10.7432	9.87222	1.52574	1.57152	95.7069	99.3331	79.3805	80.1731
PZ2spr	5.2		14.6571		15.1072		1.57934		9.56554		1.58153		101.348		82.1546
PZ3spr	5.1		17.7252		14.2944		1.53573		9.3079		1.60728		100.945		78.9843
PZ1sum	6.9	6.76667	9.40405	8.89125	13.3825	13.1226	2.13321	2.12449	6.2734	6.17837	1.8519	1.83473	100.139	99.3331	93.2506	91.4673
PZ2sum	6.7		7.33012		12.7898		2.15066		5.94694		1.76177		96.9156		91.071
PZ3sum	6.7		9.93959		13.1954		2.0896		6.31477		1.89052		100.945		90.0803
PZ1aut	7.1	7.1	22.2	21.8867	9.8265	9.8473	1.78432	1.79449	5.50715	5.4949	1.28542	1.23965	88.8574	89.6632	83.7397	83.8718
PZ2aut	7.1		21.6		9.70173		1.86718		5.19593		1.22963		91.8792		84.9286
PZ3aut	7.1		21.86		10.0137		1.73198		5.78162		1.20388		88.253		82.9471
PZ1win	6.9	6.86667	20.7	20.9933	11.3238	10.991	1.7407	1.74943	6.50528	6.2916	1.59012	1.58582	70.7263	70.9278	83.3434	83.1453
PZ2win	6.9		20.9		10.6375		1.81921		5.84734		1.64591		71.9351		81.7583
PZ3win	6.8		21.38		11.0118		1.68837		6.52217		1.52145		70.122		84.3341
CZ1spr	5	5.16667	16.5914	16.8795	13.1036	14.062	1.62295	1.60841	8.07393	8.74583	1.70599	1.72744	84.8282	86.8428	91.6655	90.2785
CZ2spr	4.8		17.1083		14.5109		1.59678		9.0876		1.6502		88.4544		90.4766
CZ3spr	5.7		16.9387		14.5715		1.60551		9.07595		1.82615		87.2457		88.6933
CZ1sum	6.5	6.5	10.2423	9.89811	13.0706	12.9666	1.67965	1.65784	7.78174	7.82163	1.80898	1.85047	104.571	102.758	95.2321	94.9679
CZ2sum	6.6		10.5583		12.977		1.65348		7.8483		1.90339		102.758		93.0525
CZ3sum	6.4		8.89371		12.8522		1.6404		7.83483		1.83902		100.945		96.6191
CZ1aut	7.2	7.03333	26.5	26.7867	8.57878	8.64116	1.96749	1.93841	4.36027	4.4615	1.90768	1.932	95.1025	93.6252	70.6622	71.9171
CZ2aut	7		26.79		9.17145		1.89771		4.83291		1.85619		92.0807		75.6158
CZ3aut	6.9		27.07		8.17327		1.95004		4.19133		2.03214		93.6923		69.4733
CZ1win	6.9	6.96667	22.9	22.9	9.88889	10.0553	2.05907	2.01691	4.80259	4.99189	1.67165	1.69597	94.6996	94.6996	80.5694	80.6355
CZ2win	7.1		22.5		9.48338		2.02854		4.67497		1.63303		95.5054		79.7768
CZ3win	6.9		23.3		10.7935		1.96313		5.49811		1.78323		93.8938		81.5601
OZ1spr	7.2	7.23333	18.4179	18.4584	13.0412	14.1042	1.97621	2.01546	6.5991	6.9944	1.6974	1.74175	77.7773	77.8444	81.5601	80.1071
OZ2spr	7.3		17.2775		14.4485		2.04163		7.07697		1.80469		79.7918		80.7675
OZ3spr	7.2		19.6796		14.8229		2.02854		7.30714		1.72315		75.9642		77.9935
OZ1sum	6.6	6.63333	8.07754	8.75936	13.3201	13.1018	2.03291	2.02564	6.55226	6.46936	1.76177	1.76177	85.8355	86.4399	92.458	94.7697
OZ2sum	6.8		7.78733		12.9146		2.05471		6.28537		1.83044		89.4617		97.0154
OZ3sum	6.5		10.4132		13.0706		1.98929		6.57046		1.69311		84.0224		94.8358
OZ1aut	7	7.03333	25.3	25.2833	7.70537	7.68457	1.84973	1.82357	4.16566	4.21403	1.89052	1.88909	74.554	74.3525	77.5972	76.2102
OZ2aut	7		24.95		7.48702		1.7974		4.16547		1.92056		72.7409		75.0214
OZ3aut	7.1		25.6		7.86134		1.82357		4.31097		1.85619		75.7627		76.0121
OZ1win	6.8	6.9	23.56	23.25	9.3898	9.58735	1.76687	1.83084	5.31436	5.24026	1.56437	1.57867	92.4836	90.6033	90.0803	90.5427
OZ2win	6.9		22.79		9.3586		1.88899		4.9543		1.63303		88.253		92.8543
OZ3win	7		23.4		10.0137		1.83665		5.45213		1.53862		91.0734		88.6933
ZJ1spr	5.6	5.86667	22.4924	21.8128	12.6724	12.2968	2.09396	2.10414	6.05185	5.85095	1.5987	1.65735	104.168	104.235	73.6344	72.9078
ZJ2spr	5.7		21.4329		11.3274		2.15066		5.26695		1.70599		101.751		72.6436
ZJ3spr	6.3		21.513		12.8907		2.0678		6.23403		1.66736		106.787		72.4455
ZJ1sum	5.5	5.43333	13.8968	14.4699	9.88889	10.1904	1.77559	1.74652	5.56934	5.83811	1.97635	1.98493	102.758	104.168	99.1949	100.318
ZJ2sum	5.4		14.8424		10.388		1.70581		6.08975		2.05359		100.743		98.2042
ZJ3sum	5.4		14.6705		10.2944		1.75815		5.85525		1.92485		109.003		103.554
ZJ1aut	6.5	6.46667	28.48	28.8933	9.8265	9.79531	1.7189	1.76833	5.71674	5.53919	1.53862	1.56008	79.1875	78.986	73.0399	72.9739
ZJ2aut	6.3		28.7		10.3256		1.82793		5.64879		1.64161		76.1656		74.0307
ZJ3aut	6.6		29.5		9.23383		1.75815		5.25202		1.5		81.6049		71.8511
ZJ1win	7	7	20.2	19.9233	10.232	9.90968	2.10705	2.10269	4.85609	4.71432	1.95489	1.96777	94.2967	93.4237	90.8729	91.005
ZJ2win	7		19.9		9.57696		2.13321		4.48945		1.86048		92.4836		89.4859
ZJ3win	7		19.67		9.92008		2.0678		4.79742		2.08793		93.4908		92.6562
Footnote: SWC: soil water content; TOC: total organic carbon; TN: total nitrogen; C/N: ratio of C and N; TP: total phosphorus; AP: available phosphorus; AK: available potassium.
