# Supplementary material for: Seasonal Changes in Soil Microbial Community and Co-Occurrence Network of Species of the Genus Corylus
Source: Microorganisms. 2021 Oct 26;9(11):2228. doi: 10.3390/microorganisms9112228 (PMC8625130; doi:10.3390/microorganisms9112228)
Supplement: Supplementary file 1 [file microorganisms-09-02228-s001.zip › Table S2.xlsx]

## Sheet: ALL
Table S2 Significant differences in soil properties and microbial diversity of four Corylus species
Sample	No.	pH	SWC	TOC	TN	C/N	TP	AP	AK	Bacteria				Fungi
										Richness	Shannon	Evenness	Coverage	Richness	Shannon	Evenness	Coverage
CKspr	1	h	i	fg	abc	jkl	a	cde	c	ab	ab	abc	abc	bcdef	abc	ab	abcd
CKsum	2	cdef	l	bc	abc	def	defg	c	d	ab	a	abc	abc	b	ab	abcd	cd
CKaut	3	def	a	e	f	efg	ijk	i	g	ab	ab	abc	abc	bcde	abcd	abcde	abcd
CKwin	4	ab	d	d	ef	de	efgh	gh	c	a	a	a	abc	bcdef	abcd	bcde	abcd
PZspr	5	h	i	a	h	a	k	b	e	ab	ab	bc	abc	bcde	abc	ab	bcd
PZsum	6	bcdef	kl	cd	a	fg	cdef	b	c	ab	a	abc	abc	bc	abcd	cde	d
PZaut	7	abc	ef	f	ef	hi	l	def	d	ab	ab	abc	abc	bcde	ab	abc	abcd
PZwin	8	abcde	fg	e	ef	fg	jk	i	de	a	a	abc	abc	f	e	de	a
CZspr	9	h	i	b	gh	b	fghi	ef	c	ab	ab	abc	ab	def	bcde	cde	abcd
CZsum	10	f	k	cd	g	c	cde	ab	b	ab	a	abc	abc	bcdef	bcde	de	bcd
CZaut	11	abcd	b	g	d	kl	bc	cd	g	ab	ab	abc	abc	bcd	abc	abcd	abcd
CZwin	12	abcde	de	f	cd	ijk	ghij	c	e	ab	a	abc	bc	ef	e	e	abcd
OZspr	13	a	h	b	cd	d	efgh	gh	e	ab	ab	abc	abc	ef	bcde	abcde	abcd
OZsum	14	ef	kl	cd	bc	defg	efgh	f	b	ab	a	abc	abc	bcdef	bcde	de	cd
OZaut	15	abcd	c	h	e	l	bcd	hi	f	ab	ab	abc	abc	bcdef	abcd	abcd	abcd
OZwin	16	abcde	d	f	e	hij	k	cdef	c	a	a	ab	c	f	e	e	ab
ZJspr	17	g	ef	d	ab	gh	hijk	a	g	ab	ab	c	abc	cdef	cde	cde	cd
ZJsum	18	h	j	ef	ef	gh	b	a	a	a	a	a	abc	a	ab	cde	e
ZJaut	19	f	a	f	ef	hi	k	g	g	a	a	ab	c	a	a	a	cd
ZJwin	20	abcd	g	f	ab	jkl	b	cd	c	b	b	bc	a	cdef	de	de	abc
Footnote: SWC: soil water content; TOC: total organic carbon; TN: total nitrogen; C/N: ratio of C and N; TP: total phosphorus; AP: available phosphorus; AK: available potassium.
