# Supplementary material for: Seasonal Changes in Soil Microbial Community and Co-Occurrence Network of Species of the Genus Corylus
Source: Microorganisms. 2021 Oct 26;9(11):2228. doi: 10.3390/microorganisms9112228 (PMC8625130; doi:10.3390/microorganisms9112228)
Supplement: Supplementary file 1 [file microorganisms-09-02228-s001.zip › Table S3.xlsx]

## Sheet: Sheet1
Table S3 Microbial diversity of four Corylus species
Sample	Bacteria								Fungi
	Richness	Average	Shannon	Average	Evenness	Average	Coverage	Average	Richness	Average	Shannon	Average	Evenness	Average	Coverage	Average
CK1spr	1345	1309.67	5.92865	5.79022	0.110264	0.0880023	0.952546	0.954563	500	520	4.0342	4.08747	0.059959	0.0549883	0.995082	0.994872
CK2spr	1288		5.5608		0.050703		0.955398		578		4.26102		0.054177		0.994185
CK3spr	1296		5.88121		0.10304		0.955744		482		3.96718		0.050829		0.995348
CK1sum	1387	1413.67	5.98825	6.05739	0.097776	0.111274	0.957386	0.955139	638	622	4.37058	4.21583	0.049323	0.0418193	0.994252	0.994263
CK2sum	1407		6.04595		0.114226		0.954188		593		4.04465		0.034408		0.994185
CK3sum	1447		6.13798		0.121821		0.953842		635		4.23227		0.041727		0.994351
CK1aut	1339	1299.67	5.96265	5.91479	0.111323	0.10918	0.955657	0.958193	657	564	4.34094	3.95663	0.038659	0.0369887	0.994318	0.99506
CK2aut	1299		5.88137		0.103344		0.958164		560		3.43974		0.012958		0.99485
CK3aut	1261		5.90035		0.112874		0.960757		475		4.08919		0.059349		0.996013
CK1win	1453	1453.33	6.15838	6.14922	0.140555	0.131839	0.953669	0.953525	616	551.333	4.15609	3.91396	0.035396	0.033587	0.995548	0.995315
CK2win	1455		6.18361		0.12986		0.954101		486		3.61313		0.027409		0.995614
CK3win	1452		6.10568		0.125103		0.952805		552		3.97266		0.037956		0.994783
PZ1spr	1349	1277	5.90113	5.77372	0.081997	0.0812947	0.956608	0.957472	542	560.333	4.06201	4.13062	0.049781	0.0545513	0.994684	0.994506
PZ2spr	1308		5.73856		0.074536		0.953842		524		4.0046		0.051597		0.994783
PZ3spr	1174		5.68147		0.087351		0.961967		615		4.32526		0.062276		0.994052
PZ1sum	1379	1383.33	5.9954	5.98171	0.108194	0.106412	0.953929	0.953871	564	606.333	3.95728	3.93933	0.038341	0.0286827	0.993521	0.993975
PZ2sum	1386		5.96784		0.107727		0.952718		555		3.7153		0.019152		0.995348
PZ3sum	1385		5.9819		0.103315		0.954966		700		4.14542		0.028555		0.993056
PZ1aut	1367	1293	5.97837	5.81321	0.110274	0.0955453	0.953842	0.957213	638	571.333	4.21872	4.21093	0.036272	0.047407	0.994783	0.995182
PZ2aut	1323		5.95718		0.112523		0.959634		502		4.07589		0.043843		0.995647
PZ3aut	1189		5.50409		0.063839		0.958164		574		4.33819		0.062106		0.995116
PZ1win	1295	1460.67	5.75957	6.10129	0.073648	0.116634	0.955744	0.951653	435	432.667	3.63247	3.12946	0.032899	0.0229367	0.996611	0.996268
PZ2win	1490		6.20909		0.1217		0.950385		442		3.59551		0.028507		0.996877
PZ3win	1597		6.33522		0.154553		0.948829		421		2.16038		0.007404		0.995315
CZ1spr	1195	1233.67	5.76757	5.85556	0.100078	0.111818	0.961967	0.960354	433	471.333	3.53341	3.55139	0.03551	0.032169	0.995581	0.994883
CZ2spr	1222		5.86898		0.12082		0.963437		511		3.78369		0.038161		0.99465
CZ3spr	1284		5.93011		0.114556		0.955657		470		3.33706		0.022836		0.994418
CZ1sum	1448	1409.33	6.08058	5.98769	0.117353	0.105895	0.952459	0.951451	511	532.333	3.63442	3.55019	0.030559	0.024081	0.994551	0.994761
CZ2sum	1433		5.98342		0.102518		0.949175		568		3.43229		0.017906		0.994285
CZ3sum	1347		5.89908		0.097815		0.952718		518		3.58387		0.023778		0.995448
CZ1aut	1273	1309	5.85433	5.8985	0.097317	0.102667	0.958337	0.956839	681	586.333	4.16475	4.05907	0.0287	0.0420907	0.994285	0.995071
CZ2aut	1312		5.85562		0.085886		0.956954		590		4.38024		0.062908		0.99578
CZ3aut	1342		5.98555		0.124799		0.955225		488		3.63223		0.034664		0.995149
CZ1win	1482	1445	6.14437	6.07458	0.12917	0.121696	0.9522	0.950702	468	450	3.45972	3.01915	0.023197	0.0169713	0.995082	0.995038
CZ2win	1464		6.084		0.126751		0.949088		492		3.13206		0.015096		0.99465
CZ3win	1389		5.99538		0.109166		0.950817		390		2.46566		0.012621		0.995381
OZ1spr	1349	1326.33	5.93844	5.90264	0.099931	0.0972427	0.955398	0.955801	404	458	3.50203	3.63227	0.033616	0.034859	0.996079	0.995271
OZ2spr	1332		5.89808		0.100203		0.954447		434		3.54829		0.032668		0.995614
OZ3spr	1298		5.8714		0.091594		0.957559		536		3.84648		0.038293		0.994119
OZ1sum	1412	1422.67	5.98276	6.04807	0.103391	0.118131	0.953842	0.953179	541	530.333	3.80283	3.47413	0.027351	0.0245857	0.994518	0.994329
OZ2sum	1397		6.06812		0.129091		0.955657		487		2.69985		0.0076		0.994318
OZ3sum	1459		6.09333		0.121911		0.950039		563		3.91971		0.038806		0.994152
OZ1aut	1333	1343	5.95837	5.90939	0.117164	0.102042	0.954966	0.953929	514	541.333	3.84646	4.00018	0.036709	0.0412853	0.995082	0.994938
OZ2aut	1434		6.01072		0.105952		0.949866		557		4.13855		0.050892		0.994318
OZ3aut	1262		5.75909		0.083009		0.956954		553		4.01554		0.036255		0.995415
OZ1win	1544	1533.33	6.20298	6.23177	0.104668	0.126246	0.948137	0.950183	439	436	3.23208	3.04378	0.021508	0.0152543	0.996112	0.995824
OZ2win	1572		6.26942		0.132825		0.949002		437		2.97039		0.012503		0.995647
OZ3win	1484		6.2229		0.141246		0.95341		432		2.92887		0.011752		0.995714
ZJ1spr	1313	1357	5.95068	5.7161	0.10945	0.0736773	0.958769	0.956378	409	485.333	3.42562	3.39533	0.036215	0.026575	0.995381	0.994373
ZJ2spr	1579		6.22248		0.098717		0.949434		453		2.96338		0.018026		0.994584
ZJ3spr	1179		4.97513		0.012865		0.96093		594		3.79698		0.025484		0.993155
ZJ1sum	1457	1454.67	6.19271	6.16242	0.141744	0.135726	0.953496	0.952805	736	738.333	4.34487	4.2082	0.041106	0.028971	0.991826	0.99238
ZJ2sum	1441		6.16234		0.131389		0.953756		745		4.00181		0.018494		0.992026
ZJ3sum	1466		6.13222		0.134045		0.951163		734		4.27792		0.027313		0.993288
ZJ1aut	1500	1486.67	6.13093	6.13594	0.120085	0.12974	0.948742	0.949174	785	737.333	4.50927	4.59386	0.043655	0.0561363	0.993753	0.994185
ZJ2aut	1498		6.13422		0.125239		0.947964		713		4.73119		0.068964		0.994451
ZJ3aut	1462		6.14266		0.143896		0.950817		714		4.54112		0.05579		0.994351
ZJ1win	1414	1141.33	6.08788	4.96941	0.127801	0.0810517	0.951854	0.961161	516	491.333	3.83662	3.22126	0.03553	0.0202473	0.995215	0.995581
ZJ2win	448		2.56881		0.00661		0.981848		356		2.05563		0.006835		0.997109
ZJ3win	1562		6.25155		0.108744		0.94978		602		3.77154		0.018377		0.994418
