# Supplementary material for: Seasonal Changes in Soil Microbial Community and Co-Occurrence Network of Species of the Genus Corylus
Source: Microorganisms. 2021 Oct 26;9(11):2228. doi: 10.3390/microorganisms9112228 (PMC8625130; doi:10.3390/microorganisms9112228)
Supplement: Supplementary file 1 [file microorganisms-09-02228-s001.zip › Table S4.xlsx]

## Sheet: Sheet1
Table S4 Redundancy analysis (RDA) of fungi and bacteria with soil properties of four Corylus species.
Species		CK				PZ				CZ				OZ				ZJ
Type	Environmental factor	RDA1	RDA2	r2	p_values	RDA1	RDA2	r2	p_values	RDA1	RDA2	r2	p_values	RDA1	RDA2	r2	p_values	RDA1	RDA2	r2	p_values
Bacteria	pH	0.9968	-0.0794	0.588	0.014	-0.6083	-0.7937	0.3213	0.168	0.8782	0.4783	0.7435	0.005	0.2976	0.9547	0.4335	0.069	0.4202	0.9074	0.6298	0.011
	SWC	0.8301	-0.5576	0.0705	0.749	0.9812	0.1929	0.0219	0.893	0.9999	-0.0134	0.3498	0.174	0.9149	0.4037	0.0948	0.638	-0.1797	0.9837	0.2577	0.26
	TOC	0.994	-0.109	0.2881	0.208	0.4778	0.8785	0.3219	0.169	-0.9193	-0.3937	0.7409	0.006	0.4245	0.9054	0.0846	0.674	0.1606	0.987	0.0475	0.812
	TN	-0.9644	0.2645	0.2469	0.294	-0.7236	-0.6902	0.3749	0.127	0.9919	0.1272	0.7137	0.004	-0.3363	0.9418	0.097	0.634	0.7175	0.6965	0.5423	0.017
	TP	-0.7601	0.6498	0.556	0.02	0.9979	-0.0651	0.0706	0.717	0.4252	0.9051	0.1623	0.444	-0.8749	0.4842	0.5888	0.016	0.6995	-0.7147	0.3299	0.146
	AP	-0.938	0.3465	0.2098	0.36	-0.976	0.2176	0.2808	0.233	0.4631	0.8863	0.3444	0.165	0.5616	-0.8274	0.482	0.049	0.2954	-0.9554	0.0676	0.741
	AK	-0.122	0.9925	0.7062	0.005	-0.7091	-0.7051	0.1675	0.469	-0.99	-0.141	0.4841	0.079	0.2699	-0.9629	0.3909	0.099	0.0973	-0.9953	0.2799	0.207
Fungi	pH	0.9729	-0.2313	0.1896	0.357	0.9841	0.1777	0.1555	0.478	-0.9336	-0.3584	0.0435	0.81	0.7035	-0.7106	0.5905	0.019	0.6994	0.7147	0.0727	0.748
	SWC	-0.3791	0.9254	0.6102	0.016	0.2337	0.9723	0.2738	0.208	0.0736	-0.9973	0.1579	0.449	0.0387	-0.9993	0.1388	0.499	-0.8012	-0.5984	0.3495	0.153
	TOC	0.7396	-0.673	0.5843	0.027	-0.8003	-0.5995	0.1702	0.444	0.5018	0.865	0.0717	0.752	0.7198	-0.6942	0.0872	0.654	-0.7733	-0.634	0.1832	0.401
	TN	-0.0776	-0.997	0.4394	0.085	0.5012	-0.8653	0.1699	0.469	-0.7491	-0.6624	0.2252	0.319	0.9983	0.059	0.1378	0.48	0.8525	0.5227	0.0692	0.779
	TP	-0.8714	-0.4906	0.0079	0.962	0.6162	-0.7876	0.2055	0.392	0.9538	-0.3005	0.3094	0.181	0.968	0.2511	0.5694	0.028	0.9201	0.3918	0.7491	0.002
	AP	0.2146	-0.9767	0.4257	0.107	-0.8571	-0.5152	0.7582	0.003	-0.4543	0.8908	0.1108	0.596	-0.8645	0.5026	0.6493	0.016	0.7696	0.6385	0.0304	0.904
	AK	0.9998	-0.0197	0.4205	0.076	0.4486	-0.8937	0.317	0.177	-0.2207	0.9753	0.1072	0.635	-0.7707	0.6372	0.6289	0.021	0.7672	0.6414	0.5898	0.018
Footnote：SWC: soil water content; TOC: total organic carbon; TN: total nitrogen; C/N: ratio of C and N; TP: total phosphorus; AP: available phosphorus; AK: available potassium.
